# Supplementary material
Source: PubMed Central journal article supplement (PMC7611134)
Supplement: EMS123045-supplement-Supplementary_Information.pdf [file EMS123045-supplement-Supplementary_Information.pdf]

## SUPPLEMENTARY INFORMATION

### **Mutational signatures impact the evolution of anti-EGFR antibody resistance in colorectal cancer**

Andrew Woolston<sup>1</sup>, Louise J Barber<sup>1</sup>, Beatrice Griffiths<sup>1</sup>, Oriol Pich<sup>2</sup>, Nuria Lopez-Bigas<sup>2,3,4</sup>, Nik Matthews<sup>5</sup>, Sheela Rao<sup>6</sup>, David Watkins<sup>6</sup>, Ian Chau<sup>6</sup>, Naureen Starling<sup>6</sup>, David Cunningham<sup>6</sup>, Marco Gerlinger<sup>1,6\*</sup>

- 1 Translational Oncogenomics Laboratory, The Institute of Cancer Research, London SW3 6JB, UK.
- 2 Institute for Research in Biomedicine (IRB Barcelona), The Barcelona Institute of Science and Technology, Baldiri Reixac, 10, 08028 Barcelona, Spain.
- 3 Research Program on Biomedical Informatics, Universitat Pompeu Fabra, Barcelona, Catalonia, Spain.
- 4 Institució Catalana de Recerca i Estudis Avançats (ICREA), Barcelona, Spain.
- 5 Tumour Profiling Unit, The Institute of Cancer Research, London SW3 6JB, UK.
- 6 Gastrointestinal Cancer Unit, The Royal Marsden Hospital, London SW3 6JJ, UK

Corresponding Author and Lead Contact:

Dr Marco Gerlinger, MD FRCP

Translational Oncogenomics Laboratory

The Institute of Cancer Research, London

237 Fulham Road

London SW3 6JB

United Kingdom

email: marco.gerlinger@icr.ac.uk

Tel: +44 207 153 5234

**Supplementary Table 1.** Patient characteristics of metastatic RAS/RAF wild type tumors from the Prospect-C trial and similar cohorts.

|                               | Prospect C subset with paired BL and PD exome sequencing data | Entire Prospect C trial cohort (Cancer Cell. 2019 Jul 8; 36:35-50.e9) | Patients treated with cetuximab in the ASPECCT trial (Lancet Oncology 2014 May; 15:569-79) | Right sided colon cancer patients treated with cetuximab in the trial Eur J Cancer. 2015 Jul; 51:1405-14 | Left sided colon cancer patients treated with cetuximab in the trial Eur J Cancer. 2015 Jul; 51:1405-14 |
|-------------------------------|---------------------------------------------------------------|-----------------------------------------------------------------------|--------------------------------------------------------------------------------------------|----------------------------------------------------------------------------------------------------------|---------------------------------------------------------------------------------------------------------|
|                               | N=21                                                          | N=35                                                                  | N=500                                                                                      | N=150                                                                                                    | N=249                                                                                                   |
| <b>Median age (years)</b>     | 67                                                            | 66                                                                    | 61                                                                                         | 64                                                                                                       | 64                                                                                                      |
| <b>Gender</b>                 |                                                               |                                                                       |                                                                                            |                                                                                                          |                                                                                                         |
| Male                          | 66.7%                                                         | 57.1%                                                                 | 64.0%                                                                                      | 59.3%                                                                                                    | 61.9%                                                                                                   |
| Female                        | 33.3%                                                         | 42.9%                                                                 | 36.0%                                                                                      | 40.7%                                                                                                    | 38.2%                                                                                                   |
| <b>Site of Primary</b>        |                                                               |                                                                       |                                                                                            |                                                                                                          |                                                                                                         |
| Left colon/rectum             | 66.7%                                                         | 74.3%                                                                 | data not available                                                                         |                                                                                                          | 62.4%                                                                                                   |
| Right colon                   | 33.3%                                                         | 25.0%                                                                 | data not available                                                                         |                                                                                                          | 37.6%                                                                                                   |
| <b>Lines of prior therapy</b> |                                                               |                                                                       |                                                                                            |                                                                                                          |                                                                                                         |
| 1                             | 9.5%                                                          | 8.6%                                                                  | data not available                                                                         | 7.3%                                                                                                     | 2.4%                                                                                                    |
| 2 or more                     | 90.5%                                                         | 91.4%                                                                 | data not available                                                                         | 92.7%                                                                                                    | 97.6%                                                                                                   |

**Supplementary Table 2.** deconstructSigs assigned weights for BL prolonged benefit cases.

| Signatures          | C1005BL | C1007BL | C1014BL | C1018BL | C1020BL | C1024BL | C1025BL | C1026BL | C1027BL | C1030BL | C1037BL | C1044BL |
|---------------------|---------|---------|---------|---------|---------|---------|---------|---------|---------|---------|---------|---------|
| SBS1                | 0.35    | 0.33    | 0.17    | 0.35    | 0.34    | 0.36    | 0.28    | 0.25    | 0.28    | 0.42    | 0.35    | 0.25    |
| SBS3                | 0.00    | 0.00    | 0.00    | 0.00    | 0.00    | 0.00    | 0.00    | 0.00    | 0.00    | 0.00    | 0.00    | 0.00    |
| SBS5                | 0.35    | 0.42    | 0.16    | 0.31    | 0.50    | 0.42    | 0.37    | 0.38    | 0.29    | 0.35    | 0.32    | 0.00    |
| SBS6                | 0.00    | 0.07    | 0.24    | 0.10    | 0.00    | 0.07    | 0.01    | 0.00    | 0.04    | 0.00    | 0.00    | 0.00    |
| SBS15               | 0.00    | 0.00    | 0.01    | 0.00    | 0.03    | 0.00    | 0.07    | 0.11    | 0.00    | 0.00    | 0.10    | 0.09    |
| SBS17a              | 0.00    | 0.00    | 0.04    | 0.04    | 0.01    | 0.00    | 0.00    | 0.00    | 0.01    | 0.00    | 0.02    | 0.00    |
| SBS17b              | 0.00    | 0.07    | 0.00    | 0.00    | 0.00    | 0.00    | 0.11    | 0.00    | 0.06    | 0.03    | 0.10    | 0.07    |
| SBS35               | 0.14    | 0.11    | 0.12    | 0.00    | 0.12    | 0.08    | 0.16    | 0.00    | 0.00    | 0.03    | 0.00    | 0.14    |
| SBS40               | 0.16    | 0.00    | 0.28    | 0.20    | 0.00    | 0.08    | 0.01    | 0.26    | 0.32    | 0.18    | 0.11    | 0.45    |
| R2                  | 0.88    | 0.91    | 0.88    | 0.92    | 0.87    | 0.84    | 0.90    | 0.88    | 0.81    | 0.92    | 0.90    | 0.80    |
| <b>MutationLoad</b> | 191     | 212     | 234     | 172     | 98      | 205     | 160     | 235     | 198     | 143     | 143     | 172     |
